# Supplementary material for: Hypoxia-induced up-regulation of miR-27a promotes paclitaxel resistance in ovarian cancer
Source: Oxford University Press journal article supplement (doi:10.1042/bsr20192457), 2020-03-19
Supplement: bsr-2019-2457_supp.pdf [file bsr-2019-2457_supp.pdf]

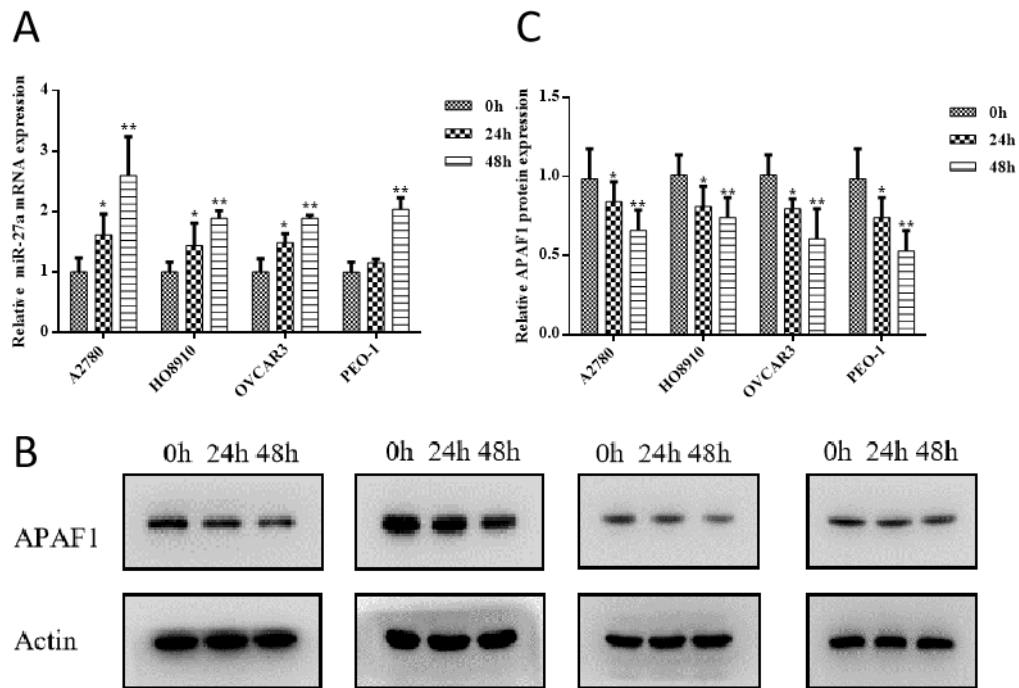

**Figure S1. Hypoxia affects the expression of miR-27a and AFAF1 in different OC cell lines.** (A) The expression level of miR-27a was detected by qPCR in A2780, HO8910, OVCAR3 and PEO-1 cells when hypoxia treatment for 0h, 24h, 48h. (B) WB analysis the expression of AFAF1 protein in A2780, HO8910, OVCAR3 and PEO-1 cells when hypoxia treatment for 0h, 24h, 48h. (C) Quantify the protein bands of the AFAF1 protein (O.D. ratio over  $\beta$ -actin). Data are shown as mean  $\pm$  SEM (n=3). Asterisks indicate significant differences from the control (\*,  $p < 0.05$ ; \*\*,  $p < 0.01$ ; \*\*\*,  $p < 0.001$ , Student's t-test).

**Figure S2:** APAF1 Full-length sequence >NM\_001160.3 Homo sapiens apoptotic peptidase activating factor 1 (APAF1), transcript variant 2, mRNA

AGAGGCGGAGAAGAAGAGGTAGCGAGTGGACGTGACTGCTCTATCCCGGGCAAA  
AGGGATAGAACCAGAGGTGGGGAGTCTGGGCAGTCGGCGACCCGCGAAGACTTG  
AGGTGCCGCAGCGGCATCCGGAGTAGCGCCGGGCTCCCTCCGGGGTGCAGCCGC  
CGTCGGGGGAAGGGCGCCACAGGCCGGGAAGACCTCCTCCCTTTGTGTCCAGTA  
GTGGGGTCCACCGGAGGGCGGCCCGTGGGCGGGCCTCACCGCGGCGCTCCGGG  
ACTGTGGGGTCAGGCTGCGTTGGGTGGACGCCACCTCGCCAACCTTCGGAGGTC  
CCTGGGGGTCTTCGTGCGCCCCGGGGCTGCAGAGATCCAGGGGAGGCGCCTGTG  
AGGCCCGGACCTGCCCGGGGCGAAGGGTATGTGGCGAGACAGAGCCCTGCACC  
CCTAATTCCCGGTGGAAAACCTCCTGTTGCCGTTTCCCTCCACCGGCCTGGAGTCTC  
CCAGTCTTGTCCCGGCAGTGCCGCCCTCCCCACTAAGACCTAGGCGCAAAGGCTT  
GGCTCATGGTTGACAGCTCAGAGAGAGAAAGATCTGAGGGAAGATGGATGCAA  
AGCTCGAAATTGTTTGCTTCAACATAGAGAAGCTCTGGAAAAGGACATCAAGACA  
TCCTACATCATGGATCACATGATTAGTGATGGATTTTTAACAATATCAGAAGAGGAA  
AAAGTAAGAAATGAGCCCACTCAACAGCAAAGAGCAGCTATGCTGATTAAAATGA  
TACTTAAAAAAGATAATGATTCCCTACGTATCATTCTACAATGCTCTACTACATGAAG  
GATATAAAGATCTTGCTGCCCTTCTCCATGATGGCATTCTGTTGTCTCTTCTTCCA  
GTGTAAGGACAGTCCTGTGTGAAGGTGGAGTACCACAGAGGCCAGTTGTTTTTGT  
CACAAGGAAGAAGCTGGTGAATGCAATTCAGCAGAAGCTCTCCAAATTGAAAGG  
TGAACCAGGATGGGTCACCATACATGGAATGGCAGGCTGTGGGAAGTCTGTATTA  
GCTGCAGAAGCTGTTAGAGATCATTCCCTTTTAGAAGGTTGTTTCCAGGGGGAG  
TGCATTGGGTTTCAGTTGGGAAACAAGACAAATCTGGGCTTCTGATGAAACTGCA  
GAATCTTTGCACACGGTTGGATCAGGATGAGAGTTTTTCCAGAGGCTTCCACTTA  
ATATTGAAGAGGCTAAAGACCGTCTCCGCATTCTGATGCTTCGCAAACACCCAAG  
GTCTCTCTTGATCTTGGATGATGTTTGGGACTCTTGGGTGTTGAAAGCTTTTGACA  
GTCAGTGTGAGATTCTTCTTACAACCAGAGACAAGAGTGTTACAGATTCAGTAATG  
GGTCCTAAATATGTAGTCCCTGTGGAGAGTTCCTTAGGAAAGGAAAAAGGACTTG  
AAATTTTATCCCTTTTTGTTAATATGAAGAAGGCAGATTTGCCAGAACAAGCTCATA  
GTATTATAAAAGAATGTAAAGGCTCTCCCCTTGTAAGTATCTTTAATTGGTGCACCTT  
TACGTGATTTTCCCAATCGCTGGGAGTACTACCTCAAACAGCTTCAGAATAAGCAG  
TTTAAGAGAATAAGGAAATCTTCGTCTTATGATTATGAGGCTCTAGATGAAGCCATG  
TCTATAAGTGTTGAAATGCTCAGAGAAGACATCAAAGATTATTACACAGATCTTTC  
CATCCTTCAGAAGGACGTTAAGGTGCCTACAAAGGTGTTATGTATTCTCTGGGACA  
TGGAACCTGAAGAAGTTGAAGACATACTGCAGGAGTTTGTAAATAAGTCTCTTTTA  
TTCTGTGATCGGAATGGAAAGTCGTTTCGTTATTATTACATGATCTTCAAGTAGAT  
TTTCTTACAGAGAAGAATTGCAGCCAGCTTCAGGATCTACATAAGAAGATAATCAC  
TCAGTTTCAGAGATATCACCAGCCGCATACTCTTTCACCAGATCAGGAAGACTGTA  
TGATTGGTACAACCTTCTGGCCTATCACATGGCCAGTGCCAAGATGCACAAGGAA  
CTTTGTGCTTTAATGTTTTCCCTGGATTGGATTAAAGCAAAAACAGAACTTGTAGG  
CCCTGCTCATCTGATTCATGAATTTGTGGAATACAGACATATACTAGATGAAAAGGA  
TTGTGCAGTCAGTGAGAATTTTCAGGAGTTTTTATCTTTAATGGACACCTTCTTG  
GACGACAGCCATTTCTAATATTGTACAACCTGGGTCTCTGTGAGCCGGAAACTTCA

GAAGTTTATCAGCAAGCTAAGCTGCAGGCCAAGCAGGAGGTTCGATAATGGAATGC  
TTTACCTGGAATGGATAAACAAAAAACATCACGAATCTTTCCCGCTTAGTTGTC  
CGCCCCACACAGATGCTGTTTACCATGCCTGCTTTTCTGAGGATGGTCAGAGAAT  
AGCTTCTTGTGGAGCTGATAAACCTTACAGGTGTTCAAAGCTGAAACAGGAGAG  
AACTTCTAGAAATCAAGGCTCATGAGGATGAAGTGCTTTGTTGTGCATTCTCTAC  
AGATGACAGATTTATAGCAACCTGCTCAGTGGATAAAAAAGTGAAGATTTGGAATT  
CTATGACTGGGGAAGTACACACCTATGATGAGCACTCAGAGCAAGTCAATTG  
CTGCCATTTACCAACAGTAGTCATCATCTTCTCTTAGCCACTGGGTCAAGTGACT  
GCTTCTCAAACCTTTGGGATTTGAATCAAAAAGAATGTCGAAATACCATGTTTGGT  
CATAAAATTCAGTCAATCACTGCAGATTTTACCAGATGATAAGCTTTTGGCTAGT  
TGTTCAAGCTGATGGAACCTTAAAGCTTTGGGATGCGACATCAGCAAATGAGAGGA  
AAAGCATTAAATGTGAAACAGTTCTTCTAAATTTGGAGGACCCTCAAGAGGATATG  
GAAGTGATAGTGAAGTGTTGTTTCGTGGTCTGCTGATGGTGCAAGGATAATGGTGG  
CAGCAAAAATAAAATCTTTTTGTGGAATACAGACTCACGTTCAAAGGTGGCTGA  
TTGCAGAGGACATTTAAGTTGGGTTCATGGTGTGATGTTTTCTCCTGATGGATCATC  
ATTTTTGACATCTTCTGATGACCAGACAATCAGGCTCTGGGAGACAAAGAAAGTAT  
GTAAGAACTCTGCTGTAATGTTAAAGCAAGAAGTAGATGTTGTGTTTCAAGAAAA  
TGAAGTGATGGTCCTTGCAGTTGACCATATAAGACGTCTGCAACTCATTAAATGGAA  
GAACAGGTCAGATTGATTATCTGACTGAAGCTCAAGTTAGCTGCTGTTGCTTAAGT  
CCACATCTTCAGTACATTGCATTTGGAGATGAAAATGGAGCCATTGAGATTTTAGA  
ACTTGTAACAATAGAATCTTCCAGTCCAGGTTTCAGCACAAGAAAAGTGTATGG  
CACATCCAGTTCACAGCCGATGAGAAGACTCTTATTTCAAGTTCTGATGATGCTGA  
AATTCAGGTATGGAATTGGCAATTGGACAAATGTATCTTTCTACGAGGCCATCAGG  
AAACAGTGAAAGACTTTAGACTCTTGAAAAATTCAGACTGCTTTCTTGGTCATTT  
GATGGAACAGTGAAGGTATGGAATATTACTGGAAATAAAGAAAAAGACTTTGT  
CTGTCACCAGGGTACAGTACTTTCTTGTGACATTTCTCACGATGCTACCAAGTTTT  
CATCTACCTCTGCTGACAAGACTGCAAAGATCTGGAGTTTTGATCTCCTTTTGCCA  
CTTCATGAATTGAGGGGCCACAACGGCTGTGTGCGCTGCTCTGCCTTCTCTGTGG  
ACAGTACCCTGCTGGCAACGGGAGATGACAATGGAGAAATCAGGATATGGAATGT  
CTCAAACGGTGAGCTTCTTCATTTGTGTGCTCCGCTTTCAGAAGAAGGAGCTGCT  
ACCCATGGAGGCTGGGTGACTGACCTTTGCTTTTCTCCAGATGGCAAAATGCTTAT  
CTCTGCTGGAGGATATATTAAGTGGTGGAACGTTGTCACTGGGGAATCCTCACAGA  
CCTTCTACACAAATGGAACCAATCTTAAGAAAATACACGTGTCCCCTGACTTCAAA  
ACATATGTGACTGTGGATAATCTTGGTATTTTATATATTTTACAGACTTTAGAATAAA  
ATAGTTAAGCATTAAATGTAGTTGAACTTTTTAAATTTTGAATTGGAAAAAATTCT  
AATGAAACCCTGATATCAACTTTTTATAAAGCTCTTAATTGTTGTGCAGTATTGCAT  
TCATTACAAAAGTGTGTTGTTGGATGAATAATATTAATGTAGCTTTTTCCCAAAT  
GAACATACCTTTAATCTTGTTTTTTCATGATCATCATTAAACAGTTTGTCTTAGGATGC  
AAATGAAAATGTGAATACATACCTTGTGTACTGTTGGTAAAATTCTGTCTTGATGC  
ATTCAAAATGGTTGACATAATTAATGAGAAGAATTTGGAAGAAATTGGTATTTAAT  
ACTGTCTGATTTTACTGTTATGCAGGCTGTGCCTCAGGGTAGCAGTGGCCTGCT  
TTTTGAACCACACTTACCCCAAGGGGGTTTTGTTCTCCTAAATACAATCTTAGAGG  
TTTTTTGCACTCTTTAAATTTGCTTTAAAAATATTGTGTCTGTGTGCATAGTCTGCA  
GCATTTCTTTAATTGACTCAATAAGTGAGTCTTGGATTTAGCAGGCCCCCCCACCT

TTTTTTTTTGTGGAGACAGAGTCTTGCTTTGTTGCCAGGCTGGAGTGCAGTG  
GCGCGATCTCGGCTCACCACAATCGCTGCCTCCTGGGTCAAGCAATTCTCCTGCC  
TCAGCCTCCCGAGTAGCTGGGACTACAGGTGTGCGCACATGCCAGGCTAATTTTTG  
TATTTTTAGTAGAGACGGGGTTTCACCATGTTGGCCGGGATGGTCTCGATCTCTTG  
ACCTCATGATCTACCCGCCTTGGCCTCCCAAAGTGCTGAGATTACAGGCGTGAGCC  
ACCGTGCCTGGCCAGGCCCTTCTCTTTAATGGAGACAGGGTCTTGCACTATCAC  
CCAGGCTGGAGTGCAGTGGCATAATCATACTCATTGCAGCCTCAGACTCCTGGGT  
TCAAGCAATCCTCCTGCCTCAGCCTCCCAAAGTAGCTGAGACTACAGGCACGAGCC  
ACCACACCCAGCTAATTTTTAAGTTTTCTTGTAGAGACAGGGTCTCACTATGTTGT  
CTAGGCTGGTCTTGAACCTTGGCCTCAAGTAATCCTCCTGCCTCAGCCTCCCAA  
GTGTTGGGATTGCAGATATGAGCCACTGGCCTTTCAGCAGTTCTTTTTGTGA  
AGTAAACTTGTATGTTGGAAAGAGTAGATTTTATTGGTCTACCCTTTTCTCACTGT  
AGCTGCTGGCAGCCCTGTGCCATATCTGGACTCTAGTTGTCAGTATCTGAGTTGGA  
CACTATTCCTGCTCCCTCTTGTCTTACATATCAGACTTCTTACTTGAATGAAACC  
TGATCTTTCCTAATCCTCACTTTTTCTTTTTTAAAAAGCAGTTTCTCCACTGCTAA  
ATGTTAGTCATTGAGGTGGGGCCAATTTAATCATAAGCCTTAATAAGATTTTTCTA  
AGAAATGTGAAATAGAACAATTTTCATCTAATTCATTTACTTTTAGATGAATGGCA  
TTGTGAATGCCATTCTTTAATGAATTTCAAGAGAATTCTCTGGTTTTCTGTGTAAT  
TCCAGATGAGTCACTGTAACCTCTAGAAGATTAACCTTCCAGCCAACCTATTTTCT  
TTCCCTTGTCTCTCCTCCTTTTTCTTCTTCTTCTTCTTCTTCTTCTTCTTCTTCT  
AAGGTTAATCAGGAAAAATAGCTTTTGACAGGGGAAAAAACTCAATAACTAGCTA  
TTTTTGACCTCCTGATCAGGAACCTTAGTTGAAGCGTAAATCTAAAGAAACATTTT  
CTCTGAAATATATTATTAAGGGCAATGGAGATAAATTAATAGTAGATGTGGTTCCCA  
GAAATATAATCAAATTCAAAGATTTTTTTTTGTTTCTGTAACCTGGAATAAATCAA  
ATGATTACTAGTGTTAATAGTAGATAACTTGTTTTATTGTTGGTGCATATTAGTATA  
ACTGTGGGGTAGGTTCGGGGAGAGGGTAAGGGAATAGATCACTCAGATGTATTTA  
GATAAGCTATTTAGCCTTTGATGGAATCATAAATACAGTGAATACAATCCTTTGCAT  
TGTTAAGGAGGTTTTTTGTTTTTAAATGGTGGGTCAAGGAGCTAGTTTACAGGCTT  
ACTGTGATTTAAGCAAATGTGAAAAGTGAAACCTTAATTTTATCAAAGAAATTTCT  
TGTAATGGTATGTCTCCTTAGAATACCCAAATCATAATTTTATTTGTACACACTGTT  
AGGGGCTCATCTCATGTAGGCAGAGTATAAAGTATTACCTTTTGGAAATAAAAGCC  
ACTGACTGTTATAAAGTATAACAACACACATCAGGTTTTAAAAAGCCTTGAATGGC  
CCTTGTCTTAAAAAGAAATTAGGAGCCAGGTGCGGTGGCACGTGCCTGTAATCCC  
AGCTCCTTGGGAGGCTAAGACAGGAGGATTCCTTGAGCCCTGGAGTTTGAGTCCA  
GCCTGGGTGACATAGCAAGACCCTGTCTTAAAAGAAAAATGGGAAGAAAGACAA  
GGTAACATGAAGAAAGAAGAGATACCTAGTATGATGGAGCTGCAAATTCATGGC  
AGTTCATGCAGTCGGTCAAGAGGAGGATTTTGTGTTTGTAGTTTGCAGATGAGCATT  
TCTAAAGCATTTTCCCTTGCTGTATTTTTTTGTATTATAAATTACATTGGACTTCATAT  
ATATAATTTTTTTTTTACATTATATGTCTCTTGTATGTTTTGAACTCTTGTATTTATGAT  
ATAGCTTATATGATTTTTTTGCCTTGGTATACATTTTAAAATATGAATTTAAAAAATTT  
TTGTAATAATAAATTCACAAAATTGTTTTGAAAAACA
